# Supplementary material for: The Short-Day Cycle Induces Intestinal Epithelial Purine Metabolism Imbalance and Hepatic Disfunctions in Antibiotic-Mediated Gut Microbiota Perturbation Mice
Source: MDPI journal article supplement (doi:10.3390/ijms23116008), 2022-05-26
Supplement: s1 [file s1]

**Table S1. The significantly different metabolites in Metabolomics of SD *vs.* NLD in colonic content and epithelium of antibiotic-treated mice**

| Classification            | Metabolites                      | FC   | <i>P</i> | VIP  | Trend |
|---------------------------|----------------------------------|------|----------|------|-------|
| <b>Colonic content</b>    |                                  |      |          |      |       |
| Amino acid                | L-Phenylalanine                  | 2.21 | 0.03     | 4.03 | up    |
| Carbohydrate              | N-Acetylneuraminic acid          | 2.13 | 0.02     | 4.22 | up    |
| Fatty acid                | Mevalonic acid                   | 0.51 | 0.01     | 2.22 | down  |
| Purine                    | Phenylglyoxylic acid             | 1.81 | 0.03     | 1.45 | up    |
| <b>Colonic epithelium</b> |                                  |      |          |      |       |
| Amino acid                | 2-Aminoadipic acid               | 0.56 | 0.04     | 1.09 | down  |
| Amino acid                | N-Acetylglycine                  | 0.61 | 0.05     | 1.47 | down  |
| Amino acid                | O-Phospho-L-serine               | 0.51 | 0.04     | 1.24 | down  |
| Amino acid                | Pyroglutamic acid                | 0.48 | 0.01     | 1.46 | down  |
| Carbohydrate              | 1,5-Anhydro-D-glucitol           | 0.66 | 0.01     | 1.33 | down  |
| Carbohydrate              | D-Glucose 6-phosphate            | 2.79 | 0.04     | 1.05 | up    |
| Carbohydrate              | D-Threose                        | 0.53 | 0.04     | 1.44 | down  |
| Carbohydrate              | N-Acetylgalactosamine 4-sulphate | 0.43 | 0.00     | 1.52 | down  |
| Fatty acid                | 2-Methylpentanedioic acid        | 0.53 | 0.03     | 1.59 | down  |
| Fatty acid                | 3-Hexenedioic acid               | 0.49 | 0.01     | 1.88 | down  |
| Fatty acid                | 3-Methyladipic acid              | 0.55 | 0.03     | 1.73 | down  |
| Fatty acid                | Citraconic acid                  | 0.32 | 0.01     | 1.25 | down  |
| Fatty acid                | Erucic acid                      | 0.31 | 0.02     | 2.19 | down  |
| Fatty acid                | Mevalonic acid                   | 0.49 | 0.05     | 1.31 | down  |
| Fatty acid                | Octanedioic acid                 | 0.59 | 0.04     | 1.09 | down  |
| Fatty acid                | Tetradecanedioic acid            | 0.60 | 0.02     | 1.56 | down  |
| Fatty acid                | Undecanedioic acid               | 0.48 | 0.02     | 1.40 | down  |
| Purine                    | cAMP                             | 3.39 | 0.01     | 2.51 | up    |
| Purine                    | cGMP                             | 2.50 | 0.02     | 2.40 | up    |
| Purine                    | N2, N2-Dimethylguanosine         | 3.43 | 0.05     | 3.16 | up    |
| Purine                    | AMP                              | 0.05 | 0.01     | 1.19 | down  |
| Purine                    | GDP                              | 0.30 | 0.01     | 1.71 | down  |
| Purine                    | GMP                              | 0.21 | 0.01     | 1.39 | down  |
| Purine                    | IMP                              | 0.15 | 0.01     | 3.41 | down  |

|            |                      |      |      |      |      |
|------------|----------------------|------|------|------|------|
| Purine     | Hydroxyadenine       | 3.01 | 0.01 | 2.55 | up   |
| Purine     | Adenine              | 0.24 | 0.01 | 4.38 | down |
| Pyrimidine | Orotidine            | 0.09 | 0.01 | 1.98 | down |
| Pyrimidine | UDP                  | 0.13 | 0.01 | 1.07 | down |
| Pyrimidine | UDP Glucuronic Acid  | 0.06 | 0.01 | 1.86 | down |
| Pyrimidine | UMP                  | 0.19 | 0.01 | 1.89 | down |
| Others     | Adenylysuccinic acid | 0.05 | 0.02 | 2.33 | down |
| Others     | dCDP                 | 0.28 | 0.01 | 1.67 | down |

FC, fold change of differential metabolites of SD vs. NLD; VIP, variable importance in the projection value from PLS-DA model. Up and down indicated that the metabolites were up-regulated and down-regulated under SD vs. NLD in colonic content and epithelium.

**Table S2. The significantly different metabolites in Metabolomics of SD *vs.* NLD in cecal content and epithelium of antibiotic-treated mice**

| Classification          | Metabolites                | FC    | <i>P</i> | VIP  | Trend |
|-------------------------|----------------------------|-------|----------|------|-------|
| <b>Cecal content</b>    |                            |       |          |      |       |
| Amino acid              | Cinnamoylglycine           | 0.55  | 0.03     | 3.22 | down  |
| Amino acid              | gamma-Glutamylleucine      | 0.50  | 0.02     | 1.19 | down  |
| Amino acid              | Glutathione                | 1.87  | 0.01     | 2.46 | up    |
| Amino acid              | L-cysteine                 | 0.27  | 0.02     | 2.58 | down  |
| Amino acid              | L-Histidine                | 2.67  | 0.03     | 4.22 | up    |
| Amino acid              | N-Lactoylphenylalanine     | 2.14  | 0.04     | 2.26 | up    |
| Amino acid              | Phenylalanylphenylalanine  | 0.41  | 0.04     | 2.51 | down  |
| Amino acid              | Tyrosyl-Tyrosine           | 0.38  | 0.04     | 3.17 | down  |
| Carbohydrate            | N-Acetylneuraminic acid    | 1.51  | 0.03     | 2.28 | up    |
| Fatty acid              | Nervonic acid              | 4.56  | 0.04     | 3.15 | up    |
| Purine                  | Adenine                    | 0.67  | 0.01     | 1.56 | down  |
| <b>Cecal epithelium</b> |                            |       |          |      |       |
| Amino acid              | Glutathione                | 0.51  | 0.01     | 1.57 | down  |
| Amino acid              | Hydroxyproline             | 0.49  | 0.03     | 1.23 | down  |
| Amino acid              | Lanthionine                | 0.44  | 0.01     | 1.11 | down  |
| Amino acid              | L-cysteine                 | 0.04  | 0.01     | 2.13 | down  |
| Amino acid              | L-Histidine                | 1.53  | 0.01     | 1.31 | up    |
| Amino acid              | Methionine sulfoxide       | 0.64  | 0.02     | 1.56 | down  |
| Amino acid              | N-Acetylmethionine         | 0.40  | 0.01     | 1.16 | down  |
| Amino acid              | Pantetheine                | 0.46  | 0.01     | 1.08 | down  |
| Amino acid              | Tyrosyl-Tyrosine           | 0.43  | 0.02     | 1.68 | down  |
| Carbohydrate            | 6'-Sialyllactose           | 2.98  | 0.02     | 1.70 | up    |
| Carbohydrate            | D-Maltose                  | 0.22  | 0.05     | 1.32 | down  |
| Carbohydrate            | Glyceraldehyde 3-phosphate | 0.47  | 0.04     | 1.03 | down  |
| Carbohydrate            | Threonic acid              | 0.34  | 0.02     | 1.30 | down  |
| Fatty acid              | 20-Carboxy-Leukotriene B4  | 5.31  | 0.02     | 2.02 | up    |
| Fatty acid              | 3-Hexenedioic acid         | 0.55  | 0.02     | 1.30 | down  |
| Fatty acid              | 3-Methyladipic acid        | 0.58  | 0.03     | 1.26 | down  |
| Fatty acid              | Docosatrienoic acid        | 24.14 | 0.03     | 1.60 | up    |
| Fatty acid              | Elaidic acid               | 2.96  | 0.01     | 1.14 | up    |

|            |                       |      |      |      |      |
|------------|-----------------------|------|------|------|------|
| Fatty acid | Ethyl dodecanoate     | 3.03 | 0.03 | 1.31 | up   |
| Fatty acid | Mevalonic acid        | 0.48 | 0.03 | 1.18 | down |
| Fatty acid | Stearic acid          | 4.29 | 0.01 | 1.30 | up   |
| Fatty acid | Undecanedioic acid    | 0.49 | 0.02 | 1.22 | down |
| Fatty acid | Azelaic acid          | 0.57 | 0.04 | 1.17 | down |
| Purine     | 2-Hydroxyadenine      | 2.34 | 0.03 | 1.56 | up   |
| Purine     | Adenine               | 0.39 | 0.01 | 2.24 | down |
| Purine     | cAMP                  | 2.07 | 0.01 | 1.19 | up   |
| Purine     | cGMP                  | 8.97 | 0.01 | 3.54 | up   |
| Purine     | Deoxyguanosine        | 0.37 | 0.03 | 1.66 | down |
| Purine     | Inosine               | 0.54 | 0.03 | 2.46 | down |
| Purine     | IMP                   | 0.31 | 0.01 | 1.27 | down |
| Purine     | Succinyladenosine     | 0.27 | 0.01 | 1.48 | down |
| Pyrimidine | 5-Methyldeoxycytidine | 0.47 | 0.02 | 1.21 | down |
| Pyrimidine | Citicoline            | 0.38 | 0.05 | 1.06 | down |
| Pyrimidine | UDP                   | 0.18 | 0.01 | 1.04 | down |

FC, fold change of differential metabolites of SD vs. NLD; VIP, variable importance in the projection value from PLS-DA model. Up and down indicated that the metabolites were up-regulated and down-regulated under SD vs. NLD in cecal content and epithelium.
